# Supplementary material for: Functional connections between and within brain subnetworks under resting-state
Source: PubMed Central journal article supplement (PMC7044315; doi:10.1038/s41598-020-60406-7), 2020-02-26
Supplement: 41598_2020_60406_MOESM1_ESM.pdf [file 41598_2020_60406_MOESM1_ESM.pdf]

# Functional connections between and within brain subnetworks [Supplementary Material]

Fabrizio Parente\* and Alfredo Colosimo\*

\*Dept. of Anatomy, Histology, Forensic Medicine and Orthopaedics Sapienza. University of Rome

## 1 Metrics and jargon used in this paper.

Basic Notation:

$N$  = set of all nodes in the network;

$n$  = total number of nodes in a network;

$k$  = node degree;

$l$  = total number of links in a network.

- *Rich-club coefficient:*

Networks having a relatively high rich-club coefficient are characterized by many connections between nodes of high degree [1].

$$\phi(k)_{rich} = \frac{2E_{>k}}{n_{>k}(n_{>k} - 1)} \quad (1)$$

where  $E_{>k}$  = number of links within nodes  $n_{>k}$ , having node degree higher than  $k$ .

- *Small-world phenomenon:*

It is generally defined in terms of segregation-integration balance. In the present paper segregation and integration were evaluated through local efficiency and global efficiency, respectively.

- *Efficiency:*

It has been proposed to evaluate the information exchange within a network [2]. The concept can be applied at both local and global scales. *Local efficiency* = measure of the information exchange between each node and its neighbors [3]:

$$E_{loc} = 1/n \sum_{i \in N} \frac{\sum_{j,h \in N; j \neq i} a_{ij} a_{ih} [d_{jh}(N_i)]^{-1}}{k_i(k_i - 1)} \quad (2)$$

where  $a_{ij}$  = binary value equal to 1 if a link between i and j node does exist;  $d_{ij}$  = shortest path length between nodes i and j.

*Global efficiency* = measure of the information exchange across the whole network

$$E_{glo} = 1/n \sum_{i \in N} \frac{\sum_{j \in N; j \neq i} d_{ij}^{-1}}{n - 1} \quad (3)$$

- *(Dis)assortativity:*

Pearson correlation coefficient used to evaluate up to what extent nodes associate with other nodes sharing similar or different characters. In a disassortative network high degree nodes are connected, on average, to nodes with low(er) degree and, on average, low degree nodes are connected to high(er) degree nodes.

- *Modularity:*

A module is a set of nodes densely connected internally. If the nodes can be grouped into potentially overlapping and highly interconnected sets, the concept allows for a coarse-grained, and thus simplified, description of the network and of its community structure. The presence of community structures in networks, including non-overlapping modules, is based upon the evaluation of the Q index [4].

- *Q index:*

Q is defined as the normalized fraction of links in a module minus the expected number in an equivalent random network [4]:

$$Q = \frac{1}{l} \sum_{i,j \in N} (a_{ij} - \frac{k_i k_j}{l}) \delta_{m_i m_j} \quad (4)$$

where  $a_{ij}$  = binary value equal to 1 if a link between i and j node does exist;  $k_i$  and  $k_j$  = node degree of nodes i and j;  $m_i$  and  $m_j$  = module of i and j;  $\delta_{m_i m_j}$  = Kronecker delta with value 1 if  $m_i = m_j$ , 0 otherwise.

- *Functional cartography:*

Method able to extract information from the topology of a complex network by means of the  $z$  and  $P$  indexes [5].

*Within module node degree ( $z_i$ ):* measure of the intra-module connectivity, for node  $i$ ,  $z_i$  spans from  $-\infty$  to  $+\infty$  and nodes with  $z > 2.5$  are defined *hubs*:

$$z_i = \frac{k_i(m_i) - \langle k \rangle (m_i)}{\sigma^{k(m_i)}} \quad (5)$$

where:  $m_i$  = module containing node  $i$ ;  $k_i(m_i)$  = intra-module node degree of node  $i$  (the number of links between  $i$  and all other nodes in  $m_i$ );  $\langle k \rangle (m_i)$  = average of the intra-module node degree of nodes within-module  $m_i$ ;  $\sigma^{k(m_i)}$  = standard deviation of the intra-module node degree of nodes within-module  $m_i$ .

*Participation coefficient ( $P_i$ ):* measure of the inter-module connectivity, for node  $i$ ,  $P_i$  spans from 0 to 1, if the connections are within their own module, or distributed in all modules, respectively:

$$P_i = 1 - \sum_{m \in M} \left( \frac{k_i(m)}{k_i} \right)^2 \quad (6)$$

where:  $M$  = set of modules;  $k_i(m)$  = number of links between  $i$  and nodes in module  $m$ .

- *Null statistical models by network randomization:*

The statistical significance of the results was checked by the straightforward method in [6] whose main advantage is the preservation, in the randomized network, of the degree distribution present in the original network.

## 2 Anatomical location of brain regions and modules.

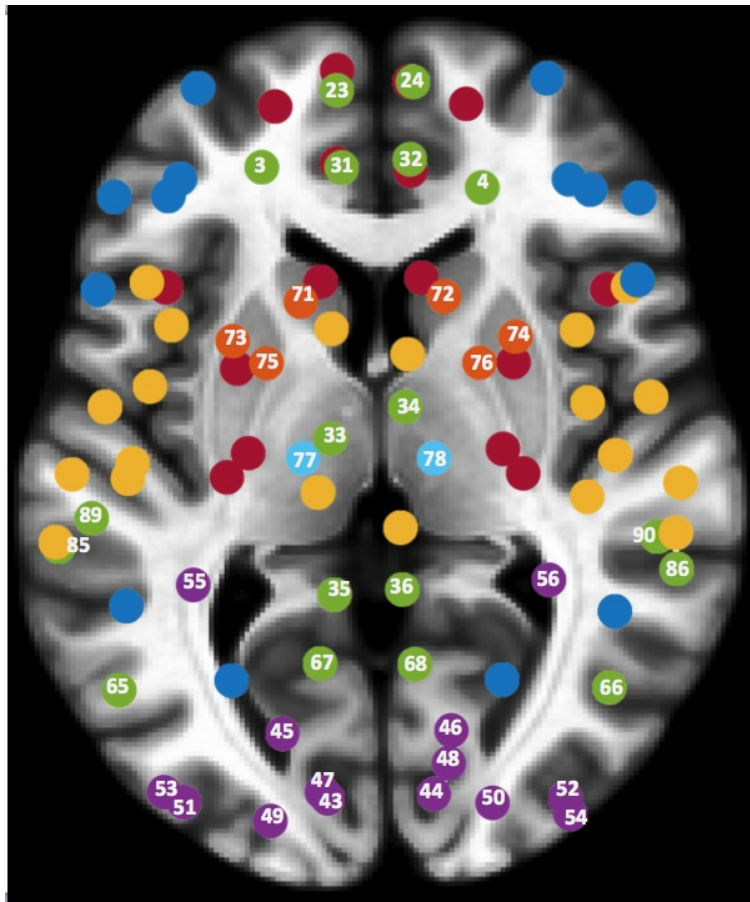

Figure 1: *Brain regions within functional subnetworks (modules): sagittal view.* Color labeling is the same as in Figure 5 in the text, namely: Red = Limbic; blue = Fronto-parietal; orange = Basal-ganglia; yellow = Temporo-parietal; purple = Occipital; green = DMN; light blue = thalamus. Numeric labels refer to the 90 ROIs obtained from [7]

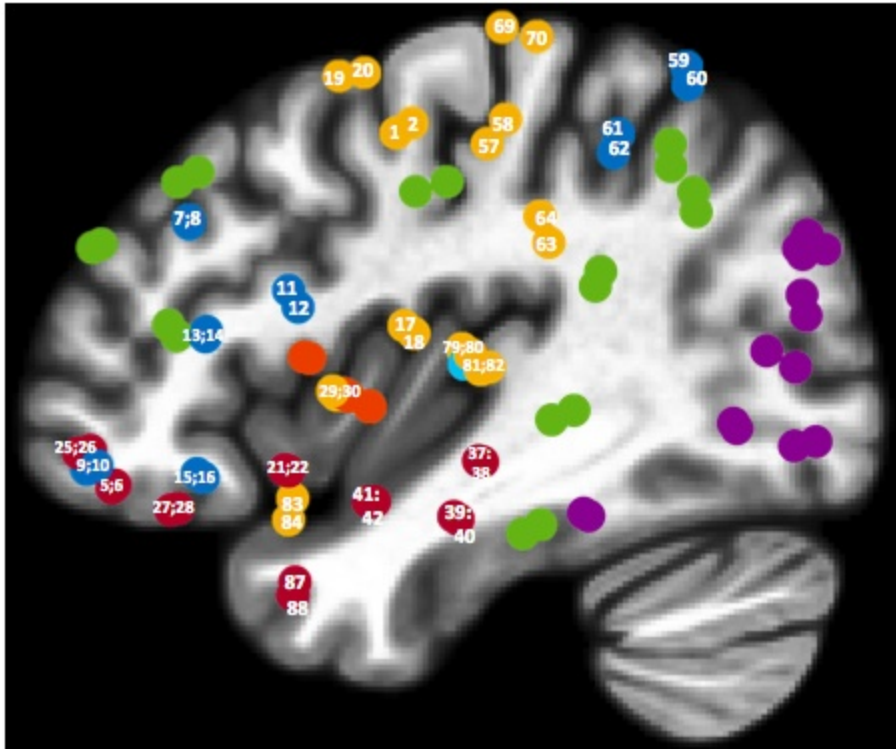

Figure 2: *Brain regions within functional subnetworks (modules), lateral view.* Color labeling is the same as in Figure 5 in the text, namely: Red = Limbic; blue = Fronto-parietal; orange = Basal-ganglia; yellow = Temporo-parietal; purple = Occipital; green = DMN; light blue = thalamus. The numeric labels refer to the 90 ROIs obtained from [7].

### 3 Overview of the research strategy used in the paper.

#### 3.1 Reckoning the parameters of an Adjacency Matrix.

In Figure 3 a simple network is reported (left panel), together with the corresponding Adjacency Matrix (right panel).

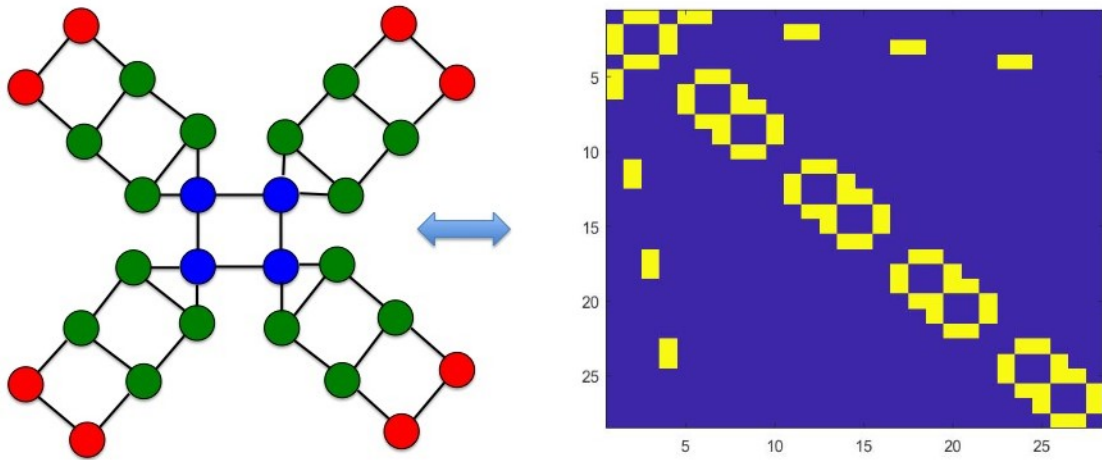

Figure 3: *Matrix and network example.* Left: a network is shown having nodes with node degree = 2, 3 and 4 in red, green and blue, respectively. Right: the corresponding adjacency matrix used by the algorithm to calculate the network indexes. The total number of links is 40 corresponding, roughly, to 10% of all possible connections.

The following sequence of operations, coded in the form of a MATLAB script, can be used to estimate the network parameters, namely the Rich-club, the Local-club and the Feeder-club indexes.

- Count the total amount of links in the network: 40 links, and saved as  $E_t$ .
- Find nodes having node degree  $> 2$  (green and blue): 20 nodes, and count the number of links between them: 28 links;
- Find nodes having node degree  $> 3$  (blue): 4, and count the number of links between them: 4;

- Find nodes having node degree  $> 4$ : 0;
- The number of nodes and of links are saved as  $N_{rich}$  and  $E_{rich}$ , respectively.
- Find nodes having node degree  $\leq 2$  (red): 8, and count the number of links between them: 4;
- Find nodes having node degree  $\leq 3$  (red and green): 24, and count the number of links between them: 28;
- Find nodes having node degree  $\leq 4$  (red, green and blue): 28, and counts the number of links: 40;
- The number of nodes and of links are saved as  $N_{local}$  and  $E_{local}$ , respectively.
- Reckon the number of links among nodes with node degree  $>2$  (green and blue) and  $\leq 2$  (red)  $\rightarrow E_t - (E_{rich} + E_{local})$ :  $40 - (28+4) = 8$ ;
- Reckon the number of links among nodes with node degree  $> 3$  (blue) and  $\leq 3$  (red and green)  $\rightarrow 40 - (4 + 28) = 8$ ;
- Reckon the number of links among nodes with node degree  $> 4$  (zero) and  $\leq 3$  (red, green and blue): 0;
- The number of links are saved as  $E_{feeder}$ .
- Reckon the rich-club coefficient (Rc):  $2 * E_{rich} / [N_{rich} * (N_{rich}-1)]$ ;
- Reckon the local-club coefficient (Lc):  $2 * E_{local} / [N_{local} * (N_{local}-1)]$ ;
- Reckon the feeder-club coefficient (Fc):  $E_{feeder} / (N_{rich} * N_{local})$ .

The values generated by the previous sequence of operations on the basis of the network and of the Adjacency Matrix reported In Figure 3 are contained in Table 1. The MATLAB function able to generate the values is the following:

$$[Rc \ Lc \ Fc \ Erich \ Elocal \ Efeeder \ Nrich \ Nlocal] = club(R,2,4)$$

where  $R$  is the  $28 \times 28$  matrix of the network in the example and 2 and 4 are the minimum and the maximum node degree values in the network. The corresponding MATLAB script can be obtained from one of the authors (F.P.) upon request.

| <b>node degree</b> | $N_{rich}$ | $N_{local}$ | $E_{rich}$ | $E_{local}$ | $E_{feeder}$ | <b>Rc</b> | <b>Lc</b> | <b>Fc</b> |
|--------------------|------------|-------------|------------|-------------|--------------|-----------|-----------|-----------|
| 2                  | 20         | 8           | 28         | 4           | 8            | 0.15      | 0.14      | 0.05      |
| 3                  | 4          | 24          | 4          | 28          | 8            | 0.67      | 0.10      | 0.08      |
| 4                  | 0          | 28          | 0          | 40          | 0            | 0         | 0.11      | 0         |

Table 1: **Network Parameters from the Adjacency Matrix in Figure 3.**



### 3.2 Schematics of the analytical steps used in this paper.

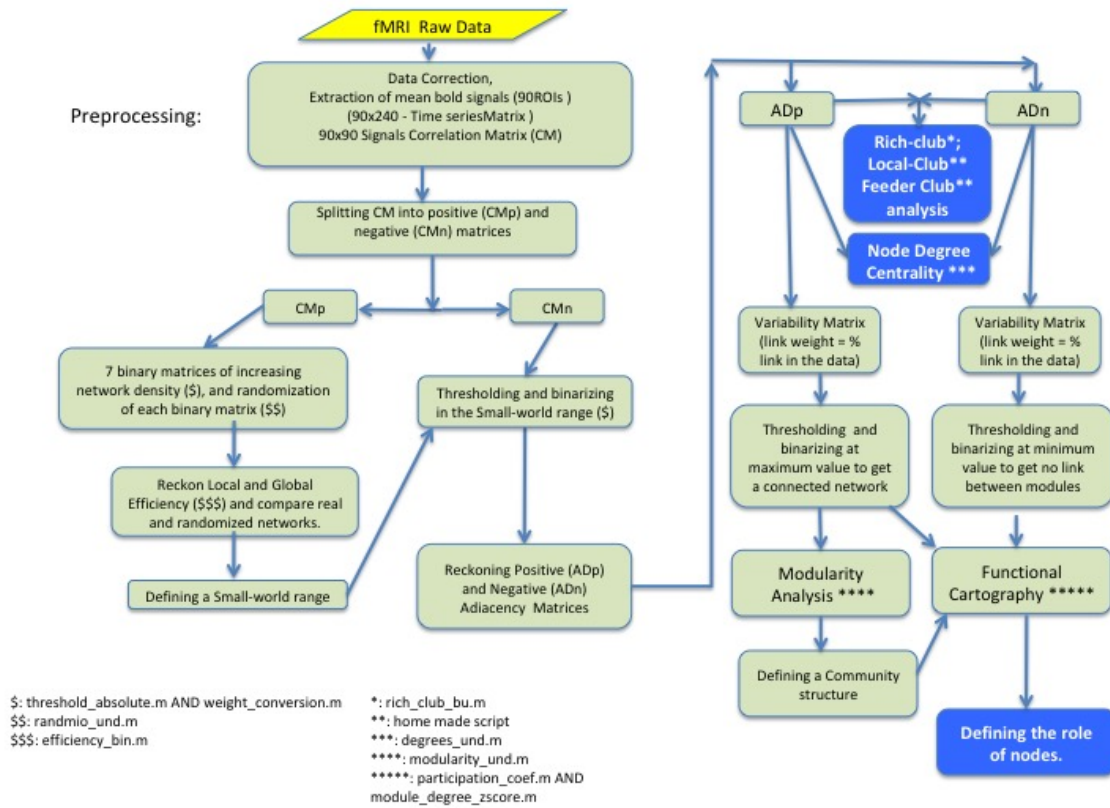

Figure 4: *Flow Chart of the computing strategy followed in this paper.* The scripts indicated by asterisks or (\$) in the flow-chart have been taken from <https://sites.google.com/site/bctnet/>. The original script named 'home made' is reported below.

## References

- [1] M. van den Heuvel and O. Sporns. Rich-club organization of the human connectome. *J Neurosci.*, 31(44):15775–15786, 2011. 1
- [2] V. Latora and M. Marchiori. Efficient behavior of small-world networks. *Phys. Rev. Lett.*, 87, 2001. 2
- [3] Rubinov M. and Sporns O. Weight-conserving characterization of complex functional brain networks. *Neuroimage*, 56:2068–2079, 2011. 2
- [4] M.E.J. Newman. Finding community structure in networks using the eigenvectors of matrices. *Phys. Rev. E*, 74:036104, 2006. 2
- [5] L.A.N. Guimera, R. Amaral. Cartography of complex networks: Modules and universal roles. *J Stat Mech Theor Exp.*, page 2005P02001, 2005. 3
- [6] S. Maslov and K. Sneppen. Specificity and stability in topology of protein networks. *Science*, 296(6):910–3, 2002. 3
- [7] N. Tzourio-Mazoyer, B. Landeau, D. Papathanassiou, F. Crivello, O. Etard, N. Delcroix, B. Mazoyer, and M. Joliot. Automated anatomical labeling of activations in spm using a macroscopic anatomical parcellation of the mni mri single-subject brain. *Neuroimage*, 15(1):273–89, 2002. 4, 5
